# Supplementary material
Source: HighWire-hosted journal article supplement (https://bmjopen.bmj.com/content/14/11/e090168)
Supplement: inline-supplementary-material-1 [file inline-supplementary-material-1.pdf]

OFFICIAL: Sensitive

Appendix I: Search strategy

OVID Medline

Search conducted in February 2024

Includes: Ovid MEDLINE(R) and Epub Ahead of Print, In-Process, In-Data-Review & Other Non-Indexed Citations, Daily and Versions 1946 to February 16, 2024

- |    |                                                                                                                                                |
|----|------------------------------------------------------------------------------------------------------------------------------------------------|
| #  | Searches                                                                                                                                       |
| 1  | Critical care/ or Critical illness/ or Intensive care units/                                                                                   |
| 2  | (Critical care or intensive care or ICU or ICUs or neurocritical care or high dependency unit* or critically ill or critical illness*).tw, kf. |
| 3  | or/1-2                                                                                                                                         |
| 4  | Cultural diversities/ or Cultural competency/ or culturally competent care/                                                                    |
| 5  | Cultural Characteristics/ or Cross-Cultural Comparison/ or Transcultural Nursing/ or Culture/                                                  |
| 6  | Refugees/                                                                                                                                      |
| 7  | "Emigrants and Immigrants"/                                                                                                                    |
| 8  | communication barriers/ or limited English proficiency/                                                                                        |
| 9  | ((Cultur* or ethnic* or racial*) adj3 (divers* or difference* or minorit* or group* or value*)).tw, kf.                                        |
| 10 | CALD.tw, kf.                                                                                                                                   |
| 11 | Ethnicity.ti, kf.                                                                                                                              |
| 12 | (cross-cultur* or socio-cultural* or sociocultural*).tw, kf.                                                                                   |

OFFICIAL: Sensitive

OFFICIAL: Sensitive

|    |    |                                                                                    |
|----|----|------------------------------------------------------------------------------------|
| 23 | 13 | (Cultural* adj2 (competen* or sensitiv* or aware* or safe*)).tw, kf.               |
| 24 | 14 | (Migrant* or immigrant* or refugee*).tw, kf.                                       |
| 25 | 15 | "non-english speaking".tw, kf.                                                     |
| 26 | 16 | or/4-15                                                                            |
| 27 | 17 | Terminal care/                                                                     |
| 28 | 18 | Terminally ill patients/                                                           |
| 29 | 19 | Palliative care/palliative care consult/palliative care team/palliative care nurse |
| 30 | 20 | Resuscitation orders/                                                              |
| 31 | 21 | advance care planning/ or advance directives/ or living wills/                     |
| 32 | 22 | Bereavement/ or Grief/                                                             |
| 33 | 23 | Death/                                                                             |
| 34 | 24 | Terminally ill.tw, kf.                                                             |
| 35 | 25 | ((Terminal* or palliative) adj3 (care or patient*)).tw, kf.                        |
| 36 | 26 | end-of-life.tw, kf.                                                                |
| 37 | 27 | ((DNR or Resuscitation) adj1 (order* or decision* or status*)).tw, kf.             |
| 38 | 28 | (Bereave* or grief or grieving).tw, kf.                                            |
| 39 | 29 | (Advance care plan* or Advance directive* or Living will*).tw, kf.                 |
| 40 | 30 | "Tissue and Organ Procurement"/                                                    |
| 41 | 31 | (organ* adj2 (donation* or donor* or procur*)).tw, kf.                             |
| 42 | 32 | or/17-31                                                                           |
| 43 | 33 | 3 and 16 and 32                                                                    |

OFFICIAL: Sensitive

44 34 (paediatric\* or pediatric\* or neonat\* or perinatal or infant\* or infancy or child\* or  
45 (adolescen\* not adult\*)).ti.

46 35 33 not 34

47 36 limit 35 to English language

48 37 family presence in the ICU

49 38 family participation in the ICU ward round

50 39 family visits

51 40 family conference and cultural issues

52 Notes on search syntax

53 • / = Medical Subject Headings (MeSH) search

54 • Tw = search on title and abstract fields

55 • Kf = search on author keyword field

56 • Ti = search on title field

57 • Truncation (\*) identifies terms with a common word stem

58 • Adj(x) identifies terms occurring within x spaces of each other, in either order

59

60
